# Supplementary material for: Effects of Dicationic Imidazolium-Based Ionic Liquid Coatings on Oral Osseointegration of Titanium Implants: A Biocompatibility Study in Multiple Rat Demographics
Source: Genes (Basel). 2022 Apr 2;13(4):642. doi: 10.3390/genes13040642 (PMC9026960; doi:10.3390/genes13040642)
Supplement: Supplementary file 1 [file genes-13-00642-s001.zip]

Archive with 4 entries (4 files):
- FigureS1_IonLMet&Phe_ACS_Final.tif
- FigureS2_MicroCT_FinalR1.jpg
- FigureS3_qpCRScatter_ACS_Final.tif
- IonL-Demo_Supporting Information for Publication_Final_Genes_R1.pdf
